# Supplementary material for: Therapeutic effect of human adipose-derived stem cells and their secretome in experimental diabetic pain
Source: PubMed Central journal article supplement (PMC5575274; doi:10.1038/s41598-017-09487-5), 2017-08-29
Supplement: 41598_2017_9487_MOESM1_ESM.pdf [file 41598_2017_9487_MOESM1_ESM.pdf]

# Therapeutic effect of human adipose-derived stem cells and their secretome in experimental diabetic pain

Anna T Brini<sup>a,b</sup>, Giada Amodeo<sup>c</sup>, Lorena M. Ferreira<sup>a,b</sup>, Anna Milani<sup>a,b</sup>, Stefania Niada<sup>a,b</sup>, Giorgia Moschetti<sup>c</sup>, Silvia Franchi<sup>c</sup>, Elisa Borsani<sup>d</sup>, Luigi F. Rodella<sup>d</sup>, Alberto E Panerai<sup>c</sup>, Paola Sacerdote<sup>c\*</sup>

<sup>a</sup>Department of Biomedical, Surgical and Dental Sciences, University of Milan, via Vanvitelli 32, 20129 Milan, Italy

<sup>b</sup>IRCCS Galeazzi Orthopaedic Institute, via Galeazzi 4, 20161 Milan, Italy

<sup>c</sup>Dipartimento di Scienze Farmacologiche e Biomolecolari, Università degli Studi di Milano, via Vanvitelli 32, 20129 Milan, Italy

<sup>d</sup>Division of Anatomy and Physiopathology, Department of Clinical and Experimental Sciences, University of Brescia, viale Europa 11, 25123 Brescia, Italy

## Supplementary data

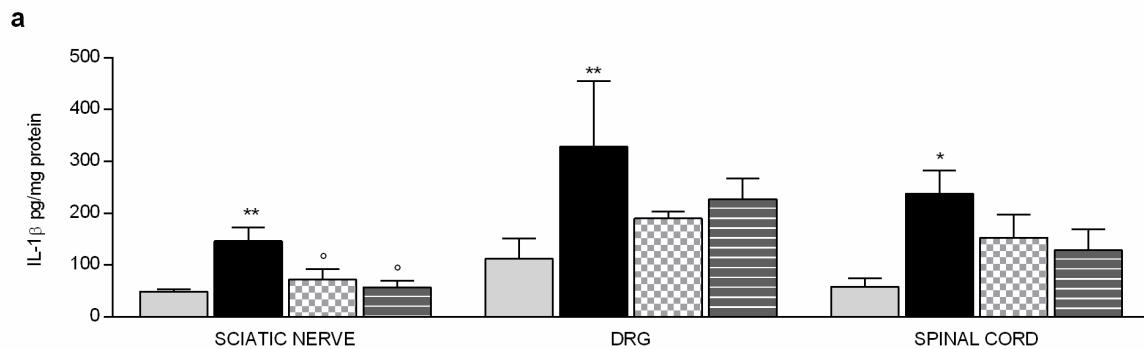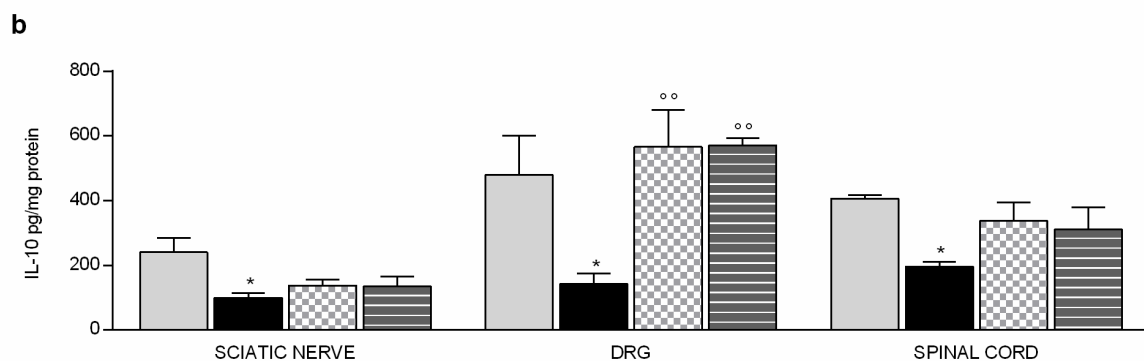

Supplementary Fig. S1. **Effect of hASC and hASC-CM on IL-1 $\beta$  and IL-10 in sciatic nerves, DRG and spinal cord of STZ mice.** IL-1 $\beta$  (a) and IL-10 (b) protein content in nervous tissues was evaluated by ELISA and reported as pg cytokine/mg total protein. Cytokines were evaluated in sciatic nerve, DRG and spinal cord 3 hours after hASC or hASC-CM treatment, two weeks after STZ. Data represent mean  $\pm$  SEM of 6 mice per group. One-way ANOVA was used for statistical evaluation, followed by Bonferroni's post hoc test for multiple comparisons. \*p<0.05, \*\*p<0.01 vs CTR; °p<0.05, °°p<0.01 vs STZ

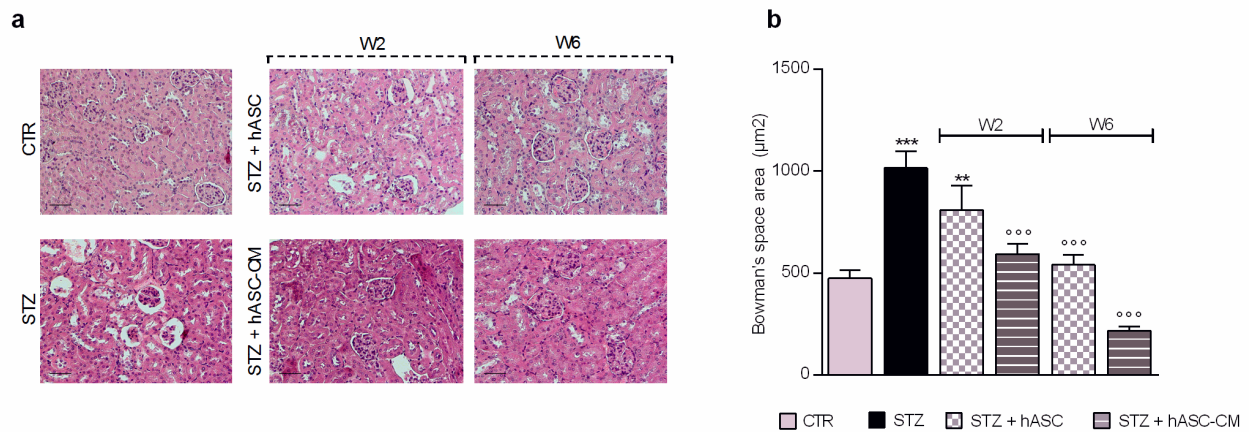

**Supplementary Fig. S2. Effect of hASC and hASC-CM on glomerular damage in STZ mice**

**a:** Hematoxylin/eosin staining of kidney sections (magnification: 200X) from CTR, STZ and STZ treated with hASC or hASC-CM, 2 weeks (W2) or 6 weeks (W6) after diabetes induction. **b:** quantification of Bowman's space area for all the animal groups. More than 30 glomeruli were measured for each group. Data were analyzed and compared by One-way ANOVA and by a Bonferroni's multiple comparison test and are expressed as mean  $\pm$  SEM. \*\* $p < 0.01$ , \*\*\* $p < 0.001$  vs CTR; ○ ○ ○  $p < 0.001$  vs STZ.
